# Supplementary material for: Screening for Potential Novel Probiotics With Dipeptidyl Peptidase IV-Inhibiting Activity for Type 2 Diabetes Attenuation in vitro and in vivo
Source: PubMed Central journal article supplement (PMC6965065; doi:10.3389/fmicb.2019.02855), 2020-01-10
Supplement: Data_Sheet_1.pdf [file Data_Sheet_1.pdf]

*Supplementary Material*

**Table S1** The rating form of antioxidative ability of *Lactobacillus* spp. strains.

| Strains    | Score | Strains    | Score |
|------------|-------|------------|-------|
| LGG        | 1.91  | KLDS1.0386 | -0.77 |
| KLDS1.0205 | 0.26  | KLDS1.1003 | 0.93  |
| KLDS1.0911 | 0.05  | KLDS1.0901 | 1.24  |
| KLDS1.0912 | -0.05 | KLDS1.0902 | -0.79 |
| KLDS1.0317 | -1.86 | KLDS1.0351 | -1.8  |
| KLDS1.0318 | -0.78 | KLDS1.0903 | -0.73 |
| KLDS1.0344 | 0.85  | KLDS1.0207 | 1.60  |

**Table S2** Composition of normal chow and high fat diet

| Diet                  | Normal diet | High fat diet |
|-----------------------|-------------|---------------|
| Energy composition(%) |             |               |
| Carbohydrate          | 63.9%       | 35%           |
| Protein               | 20.3%       | 20%           |
| Fat                   | 15.8%       | 45%           |
| Ingredients (g/kg)    |             |               |
| Casein                | 200         | 200           |
| L-Cystine             | 3           | 3             |
| Corn starch           | 397         | 72.8          |
| Maltodextrin          | 132         | 100           |
| Sucrose               | 100         | 172.8         |
| Cellulose             | 50          | 50            |
| Soybean Oil           | 70          | 25            |
| t-Butylhydroquinone   | 0.014       | 25            |
| Lard Oil              | 0           | 177.5         |
| Mineral Mix           | 35          | 10            |
| Di Calcium Phosphate  | 0           | 13            |
| Calcium Carbonate     | 0           | 5.5           |
| Potassium Bitartrate  | 0           | 16.5          |
| Vitamin Mix           | 10          | 10            |
| Choline Bitartrate    | 2.5         | 2             |
| FD&C Red Dye          | 0           | 0.05          |
